# Supplementary material
Source: HighWire-hosted journal article supplement (https://bmjophth.bmj.com/content/6/1/e000860)
Supplement: inline-supplementary-material-3 [file inline-supplementary-material-3.pdf]

**Supplemental Table 1.** Agreement between two independent ophthalmologist graders on the presence of structural features and Gass lesion type.

|                                                 | <b>Cross-sectional Data</b> | <b>Longitudinal Data</b> | <b>Mean</b> |
|-------------------------------------------------|-----------------------------|--------------------------|-------------|
| <b>Pre-vitelliform</b>                          | 93%                         | 100%                     | 96%         |
| <b>Solid vitelliform</b>                        | 86%                         | 89%                      | 88%         |
| <b>Vitelliform lesion with subretinal fluid</b> | 96%                         | 95%                      | 96%         |
| <b>Atrophy</b>                                  | 95%                         | 92%                      | 94%         |
| <b>Pillar</b>                                   | 88%                         | 78%                      | 83%         |
| <b>Focal choroidal excavation</b>               | 89%                         | 88%                      | 89%         |
| <b>Intraretinal fluid</b>                       | 84%                         | 88%                      | 86%         |
| <b>Gass staging</b>                             | 53%                         | 38%                      | 46%         |
